# Supplementary material
Source: MDPI journal article supplement (https://www.mdpi.com/2073-4433/12/2/239)
Supplement: s1 [file s1]

# Supplémentary matreials

## SM1: Different types of input emission data

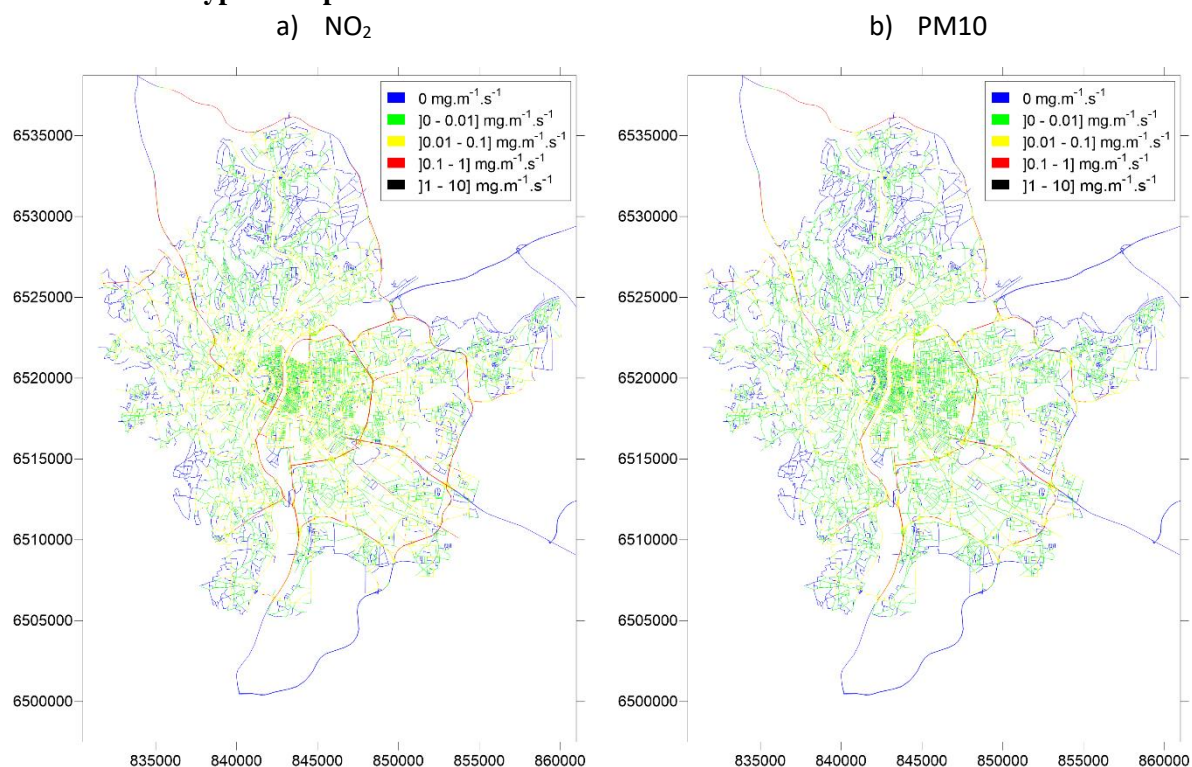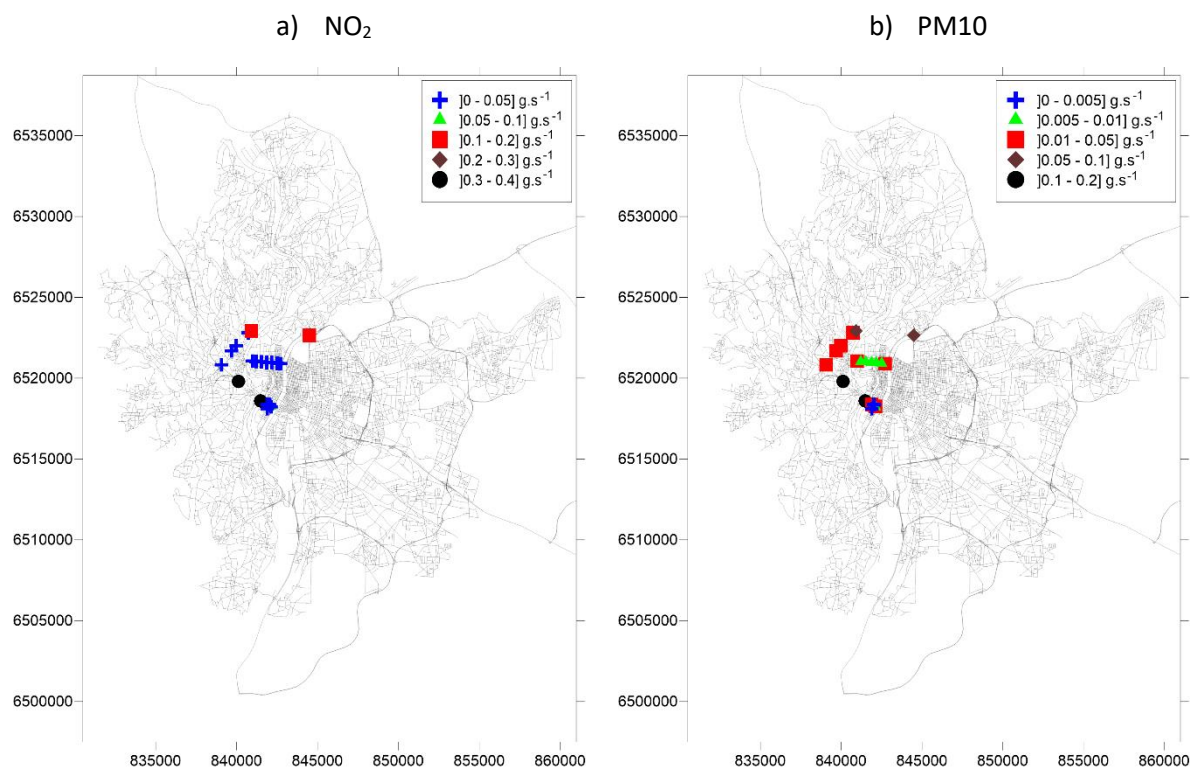

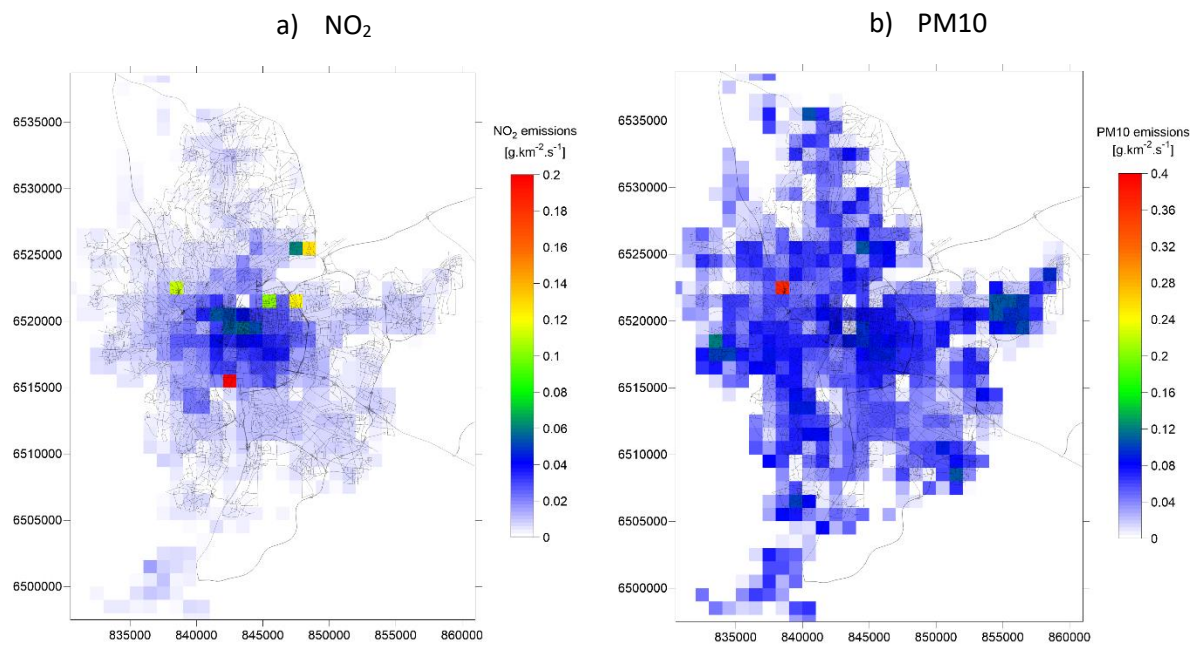

Figure 3. Spatial distribution of the surface distributed sources for NO<sub>2</sub> (a) and PM10 (b) in 2010

## SM2: Distribution of measuring stations

a) 1990

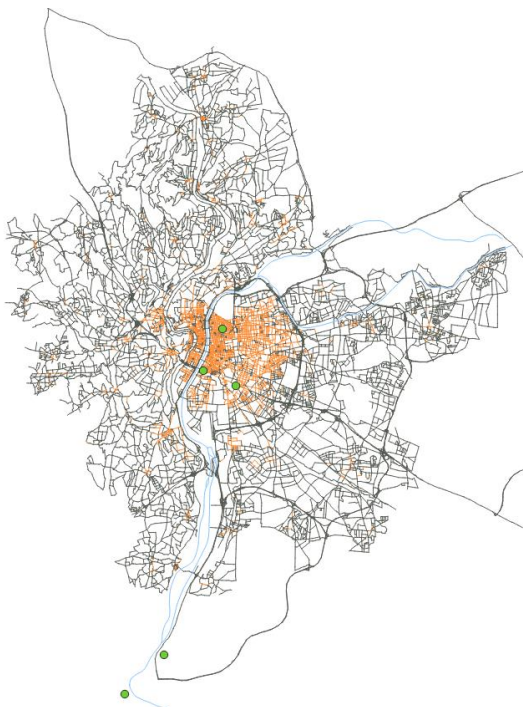

b) 2010

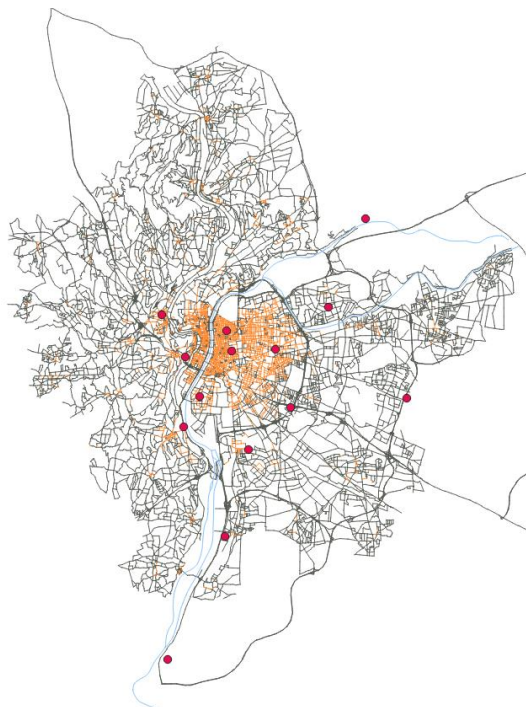

Figure 11. Spatial distribution of NO<sub>2</sub> monitoring stations in 1990 and 2010

a) 1990

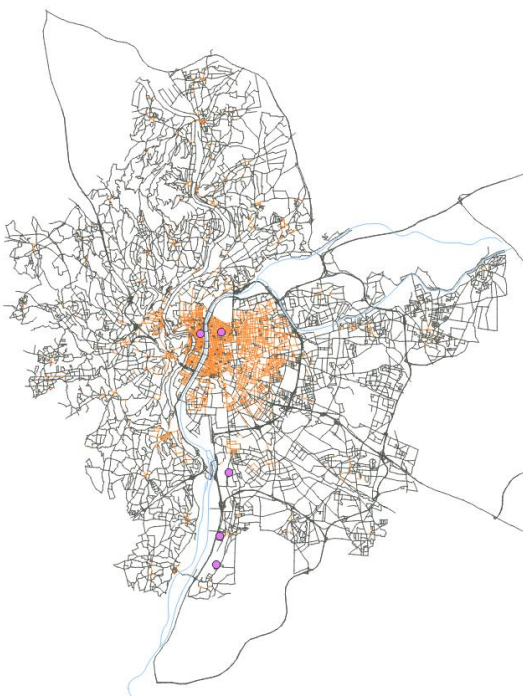

b) 2010

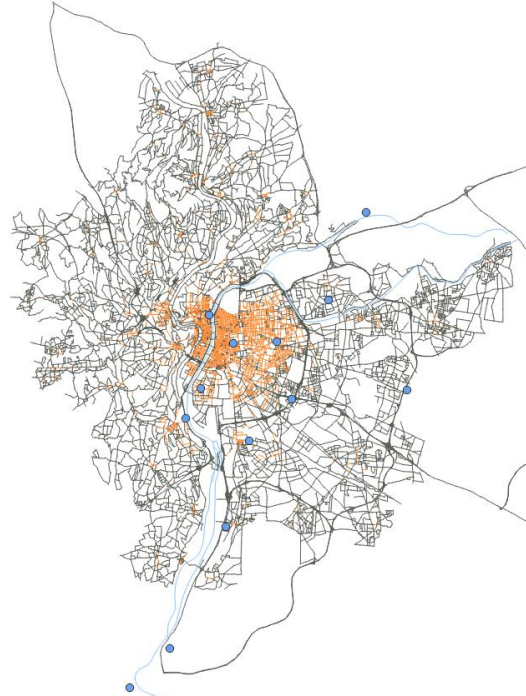

Figure 12. Spatial distribution of PM<sub>10</sub> monitoring stations in 1990 and 2010
